# Supplementary material for: Zoonotic threat of Proteus mirabilis in Xinjiang swine: antimicrobial resistance and virulence risks
Source: Research Square preprint supplement (doi:10.21203/rs.3.rs-6592294/v1), 2025-06-22
Supplement: Supplementary file 1 [file b0366eaf66693a93edfd92d3.docx]

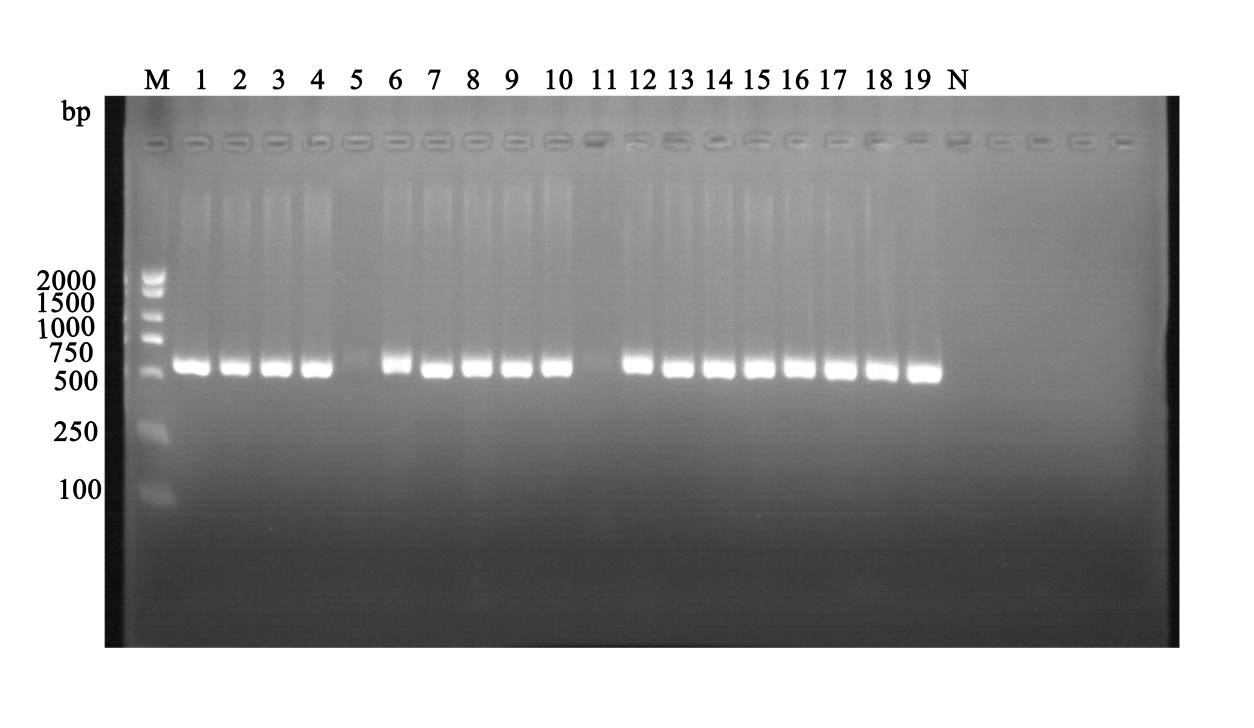
**Figure 3. Molecular confirmation of *Proteus mirabilis* isolates by PM gene PCR amplification**

**Note:** Agarose gel (1.0%) electrophoresis of PM gene PCR products (expected size: 539 bp). Lanes: M, DL2000 DNA marker; 1-19, representative *P. mirabilis* isolates; N, negative control (no template). All test strains showed the target amplicon, confirming their identity as *P. mirabilis*. It should be noted that the positive control was unfortunately missing in this gel run. However, the negative control remained blank, demonstrating assay specificity.
